# Supplementary material for: Occupations on the map: Using a super learner algorithm to downscale labor statistics
Source: PLOS journal article supplement (doi:10.1371/journal.pone.0278120), 2022-12-07
Supplement: S7 (10.1371/journal.pone.0278120.s007) [file journal.pone.0278120.s007]

| Abbreviation                            | Skill level | ISCO-08<br>Major Group | ISCO-08 description                                                           |
|-----------------------------------------|-------------|------------------------|-------------------------------------------------------------------------------|
| Managers and professionals              | 3+4         | 1, 2                   | Legislators, senior officials and managers; professionals                     |
| Technicians and associate professionals | 3           | 3                      | Technicians and associate professionals                                       |
| Clerks and service workers              | 2           | 4,5                    | Clerical support workers; service and sales workers                           |
| Agricultural workers                    | 2           | 6                      | Skilled agricultural, forestry and fishery workers                            |
| Craft workers and operators             | 2           | 7, 8                   | Craft and related trades workers; plant and machine operators, and assemblers |
| Elementary occupations                  | 1           | 9                      | Elementary occupations                                                        |

Table S1: Main occupation categories based on the International Classification of Occupations 08 (ILO 2012)

## References

ILO. 2012. *International Standard Classification of Occupations. Volume 1: Structure, group definitions and correspondence tables*. Geneva, Switzerland: International Labour Office.
